# Supplementary material for: High Tg blue emitting materials for electroluminescent devices
Source: Royal Society of Chemistry journal article supplement (doi:10.1039/b501819f), 2005-01-01
Supplement: b501819f.pdf [file b501819f.pdf]

## Supplementary data

### High $T_g$ Blue Emitting Materials for Electroluminescent Devices

Jiun Yi Shen,<sup>a</sup> Chung Ying Lee,<sup>a,c</sup> Tai-Hsiang Huang,<sup>a</sup> Jiann T. Lin,<sup>\*,a,b</sup> Yu-Tai Tao,<sup>\*,a</sup> Chin-Hsiung Chien,<sup>a</sup> and Chiitang Tsai<sup>c</sup>

<sup>a</sup>Institute of Chemistry, Academia Sinica, Taipei, Taiwan 115, Republic of China, <sup>b</sup>Department of Chemistry, National Central University, Chungli, Taiwan 320, Republic of China, and <sup>c</sup>Department of Chemistry, Chinese Culture University, Taipei, Taiwan, Republic of China, E-mail:jtlin@chem.sinica.edu.tw

4. White solid. Yield: 92%. FAB MS:  $m/e$  737 ( $M^+$ ). <sup>1</sup>H NMR (acetone- $d_6$ ):  $\delta$  8.41 (s, 1 H,  $H-4$  of carbazole), 7.90-7.87 (m, 3 H,  $H-4$  and  $H-5$  of spirobifluorene,  $H-2$  of carbazole), 7.72-7.68 (m, 4 H,  $H-4'$  and  $H-5'$  of spirobifluorene, carbazole), 7.52 (d,  $J = 8.8$  Hz, 1 H, carbazole), 7.38-7.35 (m, 3 H,  $H-6$ ,  $H-3'$  and  $H-6'$  of spirobifluorene), 7.22 (d,  $J = 8.8$  Hz, 1 H, spirobifluorene), 7.08-7.05 (m, 4 H), 6.88-6.86 (m, 3 H, ortho and para of  $C_6H_5$ ), 6.79 (d,  $J = 1.7$  Hz, 2 H,  $H-1'$  and  $H-8'$  of spirobifluorene), 6.59 (d,  $J = 7.6$  Hz, 1 H,  $H-8$  of spirobifluorene), 6.47 (d,  $J = 2.0$  Hz, 1 H,  $H-1$  of spirobifluorene), 4.49 (q,  $J = 7.2$  Hz, 2 H,  $CH_2$ ), 1.39 (t,  $J = 7.2$  Hz, 3 H,  $CH_3$ ), 1.15 (s, 18 H,  $CH_3$  of spirobifluorene). Anal. Calcd for  $C_{54}H_{47}N_3$ : C, 87.89; H, 6.42; N, 5.69. Found: C, 87.49; H, 6.31; N, 5.61.

**9-Ethyl-6-(naphthalen-1-ylamino)-9H-carbazole-3-carbonitrile (5a).** Compound **5a** was prepared by a similar procedure as described for compound **1** except that 6-bromo-9-ethyl-9H-carbazole-3-carbonitrile and naphthalen-1-amine were used instead of 2-bromo-(2',7'-di-*tert*-butyl)-9,9'-spirobifluorene and aniline. Compound **5a** was obtained as white solid in 50% yield. FAB MS:  $m/e$  361 ( $M^+$ ). <sup>1</sup>H NMR (acetone- $d_6$ )  $\delta$ : 8.50 (s, 1 H,  $H-4$  of carbazole), 8.31(d,  $J = 8.6$  Hz, 1 H,  $H-2$  of carbazole), 8.06 (d,  $J = 2.0$  Hz, 1 H,  $H-5$  of carbazole), 7.88 (d,  $J = 7.6$  Hz, 1 H, naphthalene), 7.74-7.69 (m, 2 H, naphthalene), 7.64 (d,  $J = 7.6$  Hz, 1 H,  $H-8$  of carbazole), 7.57 (s, 1 H, -NH), 7.52-7.43 (m, 4 H,  $H-1$  and  $H-7$  of carbazole, naphthalene), 7.34 (t,  $J = 7.9$  Hz, 1 H,  $H-3$  of naphthalene), 7.22 (d,  $J = 7.6$  Hz, 1 H,  $H-2$  of naphthalene), 4.54 (q,  $J = 7.2$  Hz, 2 H, - $CH_2$ -), 1.45 (t,  $J = 7.2$  Hz, 3 H, - $CH_3$ ). Anal. Calcd. for  $C_{25}H_{19}N_3$ : C, 83.08; H, 5.30; N, 11.63, found: C, 82.68; H, 5.22; N, 11.49.

5. Milky white solid. Yield: 80%. FAB MS:  $m/e$  787 ( $M^+$ ).  $^1\text{H}$  NMR (acetone- $d_6$ ):  $\delta$ : 8.30 (s, 1 H,  $H-4$  of carbazole), 7.91-7.89 (m, 3 H,  $H-2$  of carbazole,  $H-4$  and  $H-5$  of spirobifluorene), 7.83 (d,  $J = 7.6$  Hz, 1 H, naphthalene), 7.78 (d,  $J = 8.3$  Hz, 1 H, naphthalene), 7.75 (d,  $J = 8.2$  Hz, 1 H, naphthalene), 7.70-7.63 (m, 4 H,  $H-4'$  and  $H-5'$  of spirobifluorene, carbazole, naphthalene), 7.43-7.39 (m, 3 H, carbazole and naphthalene), 7.40-7.26 (m, 4 H, spirobifluorene and naphthalene), 7.19 (d,  $J = 7.4$  Hz, 1 H,  $H-3$  of spirobifluorene), 7.12 (dd,  $J = 8.7, 2.2$  Hz, 1 H,  $H-7$  of carbazole), 7.02 (t,  $J = 8.0$  Hz, 1 H,  $H-7$  of spirobifluorene), 6.82-6.79 (m, 3 H,  $H-1'$  and  $H-8'$  of spirobifluorene, naphthalene), 6.54 (d,  $J = 7.5$  Hz, 1 H,  $H-8$  of spirobifluorene), 6.47 (d,  $J = 2.0$  Hz, 1 H,  $H-1$  of spirobifluorene), 4.43 (q,  $J = 7.2$  Hz, 2 H,  $\text{CH}_2$ ), 1.35 (t,  $J = 7.2$  Hz, 3 H,  $\text{CH}_3$ ), 1.19 (s, 18 H,  $\text{CH}_3$  of spirobifluorene). Anal. Calcd for  $\text{C}_{58}\text{H}_{49}\text{N}_3$ : C, 88.40; H, 6.27; N, 5.33. Found: C, 88.68; H, 6.26; N, 5.36.

6. White solid. Yield 73%. FAB MS:  $m/e$  1189 ( $M+H$ ) $^+$ .  $^1\text{H}$  NMR (acetone- $d_6$ ):  $\delta$  7.92 (d,  $J = 8.3$  Hz, 4 H,  $H-4$  and  $H-5$  of spirobifluorene), 7.74 (d,  $J = 8.0$  Hz, 4 H,  $H-4'$  and  $H-5'$  of spirobifluorene), 7.41-7.33 (m, 10 H,  $H-6$ ,  $H-3'$  and  $H-6'$  of spirobifluorene and  $\text{C}_6\text{H}_4$ ), 7.17-7.07 (m, 8 H,  $H-3$ ,  $H-7$  of spirobifluorene and para- $\text{C}_6\text{H}_5$ ), 6.94-6.92 (m, 10 H, ortho and para of  $\text{C}_6\text{H}_5$  and  $\text{C}_6\text{H}_4$ ), 6.79-6.78 (m, 4 H,  $H-1'$  and  $H-8'$  of spirobifluorene), 6.63 (d,  $J = 8.3$  Hz, 2 H,  $H-8$  of spirobifluorene), 6.45 (d,  $J = 1.2$  Hz, 2 H,  $H-1$  of spirobifluorene), 1.19 (s, 36 H,  $\text{CH}_3$ ). Anal. Calcd for  $\text{C}_{90}\text{H}_{80}\text{N}_2$ : C, 90.87; H, 6.78; N, 2.35. Found: C, 90.47; H, 6.80; N, 2.19.

7. White solid. Yield 80%. FAB MS:  $m/e$  1463 ( $M+H$ ) $^+$ .  $^1\text{H}$  NMR (acetone- $d_6$ ):  $\delta$  7.84 (d,  $J = 7.5$  Hz, 2 H,  $H-5$  of spirobifluoren-2-yl), 7.77 (d,  $J = 8.2$  Hz, 2 H,  $H-4$  of spirobifluoren-2-yl), 7.69 (d,  $J = 8.0$  Hz, 4 H,  $H-4'$  and  $H-5'$  of spirobifluoren-2-yl), 7.65 (d,  $J = 8.2$  Hz, 2 H,  $H-4$  of spirobifluoren-2,7-yl), 7.54 (d,  $J = 8.0$  Hz, 2 H,  $H-4'$  of spirobifluoren-2,7-yl), 7.38-7.32 (m, 6 H,  $H-6$ ,  $H-3'$  and  $H-6'$  of spirobifluoren-2-yl), 7.29 (dd,  $J = 8.0, 1.8$  Hz, 2 H,  $H-3'$  of spirobifluoren-2,7-yl), 7.05 (t,  $J = 7.4$  Hz, 2 H,  $H-7$  of spirobifluoren-2-yl), 6.91-6.83 (m, 8 H,  $H-3$  of spirobifluoren-2-yl,  $H-3$  of spirobifluoren-2,7-yl and meta- $\text{C}_6\text{H}_5$ ), 6.75 (d,  $J = 1.4$  Hz, 2 H,  $H-1'$  of spirobifluoren-2,7-yl), 6.70-6.68 (m, 6 H,  $H-1'$  and  $H-8'$  of spirobifluoren-2-yl and para- $\text{C}_6\text{H}_5$ ), 6.64 (d,  $J = 7.6$  Hz, 4 H, ortho- $\text{C}_6\text{H}_5$ ), 6.58 (d,  $J = 7.5$  Hz, 2 H,  $H-4$  of spirobifluoren-2,7-yl), 6.32 (d,  $J = 1.9$  Hz, 2 H,  $H-1$  of spirobifluoren-2-yl), 6.27 (d,  $J = 1.9$  Hz, 2 H,  $H-1$  of spirobifluoren-2,7-yl), 1.19 (s, 18 H,  $\text{CH}_3$ ), 1.15 (s, 36 H,  $\text{CH}_3$ ). Anal. Calcd for  $\text{C}_{111}\text{H}_{102}\text{N}_2$ : C, 91.06; H, 7.02; N, 1.91. Found: C, 90.66; H, 6.81; N, 1.70.

**8.** Milky white solid. Yield 70%. FAB MS:  $m/e$  1477 ( $M+H$ )<sup>+</sup>. <sup>1</sup>H NMR (acetone-*d*<sub>6</sub>): δ 7.94-7.92 (m, 4 H, *H*-4 and *H*-5 of spirobifluorene), 7.76 (d,  $J = 8.1$  Hz, 4 H, *H*-4' and *H*-5' of spirobifluorene), 7.61-7.57 (m, 4 H, anthracene), 7.48 (dd,  $J = 9.2, 1.9$  Hz, 2 H, *H*-3 and *H*-7 of anthracene), 7.40-7.32 (m, 6 H, *H*-6, *H*-3' and *H*-6' of spirobifluorene), 7.22-7.15 (m, 14 H, *H*-7 of spirobifluorene, C<sub>6</sub>H<sub>4</sub>, ortho and meta of C<sub>6</sub>H<sub>5</sub>), 7.09-7.05 (m, 6 H, *H*-3 of spirobifluorene and C<sub>6</sub>H<sub>4</sub>), 6.95 (t,  $J = 7.1$  Hz, 2 H, para-C<sub>6</sub>H<sub>5</sub>), 6.80 (d,  $J = 1.6$  Hz, 4 H, *H*-1' and *H*-8' of spirobifluorene), 6.64 (d,  $J = 7.5$  Hz, 2 H, *H*-8 of spirobifluorene), 6.61 (d,  $J = 2.0$  Hz, 2 H, *H*-1 of spirobifluorene), 1.26 (s, 18 H, CH<sub>3</sub>), 1.12 (s, 36 H, CH<sub>3</sub>). Anal. Calcd for C<sub>112</sub>H<sub>104</sub>N<sub>2</sub>: C, 91.01; H, 7.09; N, 1.90. Found: C, 90.81; H, 7.19; N, 1.67.

**10.** White solid. Yield: 95%. FAB MS:  $m/e$  758 ( $M^+$ ). <sup>1</sup>H NMR (CDCl<sub>3</sub>): δ 8.15 (d,  $J = 8.1$  Hz, 2 H, *H*-4 of spirobifluorene), 8.05-8.08 (m, 4 H, *H*-3' and *H*-4' of spirobifluorene), 7.65-7.61 (m, 4 H, carbazole), 7.38 (dd,  $J = 8.1, 1.6$  Hz, 2 H, *H*-3 of spirobifluorene), 7.29-7.19 (m, 12 H, carbazole), 6.98 (d,  $J = 1.7$ , 2 H, *H*-1' of spirobifluorene), 6.94 (d,  $J = 1.6$  Hz, 2 H, *H*-1 of spirobifluorene), 1.20 (s, 18 H, CH<sub>3</sub>). Anal. Calcd for C<sub>57</sub>H<sub>46</sub>N<sub>2</sub>: C, 90.20; H, 6.11; N, 3.69. Found: C, 90.46; H, 6.22; N, 3.20.

**11.** Pale green solid. Yield: 65%. FAB MS:  $m/e$  862 ( $M^+$ ). <sup>1</sup>H NMR (acetone-*d*<sub>6</sub>): δ 7.79 (d,  $J = 8.7$  Hz, 2 H, C<sub>10</sub>H<sub>7</sub>), 7.75 (t,  $J = 7.3$  Hz, 4 H, C<sub>10</sub>H<sub>7</sub>), 7.64 (d,  $J = 8.3$  Hz, 2 H, *H*-4 of spirobifluorene), 7.59 (d,  $J = 8.0$  Hz, 2 H, *H*-4' of spirobifluorene), 7.41 (t,  $J = 7.2$  Hz, 4 H, C<sub>10</sub>H<sub>7</sub>), 7.33 (dd,  $J = 8.3, 1.8$  Hz, 2 H, *H*-3' of spirobifluorene), 7.24 (t,  $J = 7.1$  Hz, 2 H, C<sub>10</sub>H<sub>7</sub>), 7.16 (d,  $J = 7.4$  Hz, 2 H, *H*-3 of spirobifluorene), 6.99 (t,  $J = 7.4$  Hz, 4 H, meta-C<sub>6</sub>H<sub>5</sub>), 6.86 (d,  $J = 1.8$  Hz, 2 H, *H*-1' of spirobifluorene), 6.85-6.75 (m, 4 H, para-C<sub>6</sub>H<sub>5</sub> and C<sub>10</sub>H<sub>7</sub>), 6.71 (d,  $J = 7.8$  Hz, 4 H, ortho-C<sub>6</sub>H<sub>5</sub>), 6.49 (d,  $J = 2.1$  Hz, 2 H, *H*-1 of spirobifluorene), 1.2 (s, 18 H, CH<sub>3</sub>). Anal. Calcd for C<sub>65</sub>H<sub>54</sub>N<sub>2</sub>: C, 90.45; H, 6.31; N, 3.25. Found: C, 90.20; H, 6.55; N, 3.13.

**12.** Yellow green solid. Yield: 41%. FAB MS:  $m/e$  812 ( $M^+$ ). <sup>1</sup>H NMR (acetone-*d*<sub>6</sub>): δ 8.01 (d,  $J = 8.2$  Hz, 2 H, *H*-4 of spirobifluorene), 7.68 (d,  $J = 8.0$  Hz, 2 H, *H*-4' of spirobifluorene), 7.39-7.36 (m, 6 H, *H*-3' of spirobifluorene and C<sub>6</sub>H<sub>4</sub>), 7.25 (t,  $J = 6.6$  Hz, 4 H, meta-C<sub>6</sub>H<sub>5</sub>), 7.20 (dd,  $J = 8.2, 2.0$  Hz, 2 H, *H*-3 of spirobifluorene), 7.09 (t,  $J = 8.0$  Hz, 2 H, para-C<sub>6</sub>H<sub>5</sub>), 7.04 (d,  $J = 7.0$  Hz, 4 H, ortho-C<sub>6</sub>H<sub>5</sub>), 6.86 (d,  $J = 1.3$  Hz, 2 H, *H*-1 of spirobifluorene), 6.84 (d,  $J = 8.9$  Hz, 4 H, C<sub>6</sub>H<sub>4</sub>), 6.47 (d,  $J = 1.6$  Hz, 2 H, *H*-1' of

spirobifluorene), 1.20 (s, 18 H, CH<sub>3</sub>). Anal. Calcd for C<sub>59</sub>H<sub>48</sub>N<sub>4</sub>: C, 87.16; H, 5.95; N, 6.89. Found: C, 86.88; H, 5.90; N, 6.89.

**14.** Yellow solid. Yield: 87%. FAB MS: *m/e* 1011 (M+H)<sup>+</sup>. <sup>1</sup>H NMR (CDCl<sub>3</sub>): δ 8.12-7.95 (m, 14 H, pyrene), 7.77 (d, *J* = 8.0 Hz, 2 H, *H*-4 of spirobifluorene), 7.67 (d, *J* = 8.3 Hz, 2 H, *H*-4' of spirobifluorene), 7.51 (d, *J* = 7.9 Hz, 2 H, *H*-3 of spirobifluorene), 7.45 (d, *J* = 8.2 Hz, 2 H, *H*-3' of spirobifluorene) 7.27 (d, *J* = 7.8 Hz, 2 H, pyrene), 6.93 (t, *J* = 7.8 Hz, 4 H, meta-C<sub>6</sub>H<sub>5</sub>), 6.87 (d, *J* = 1.5 Hz, 2 H, *H*-1' of spirobifluorene), 6.78-6.71 (m, 10 H, *H*-1 of spirobifluorene, pyrene, C<sub>6</sub>H<sub>5</sub>), 1.20 (s, 18 H, CH<sub>3</sub>). Anal. Calcd for C<sub>77</sub>H<sub>58</sub>N<sub>2</sub>: C, 91.45; H, 5.78; N, 2.77. Found: C, 91.48; H, 5.84; N, 2.47.

**15.** Pale yellow solid. Yield: 53%. FAB MS: *m/e* 1047 (M+H)<sup>+</sup>. <sup>1</sup>H NMR (acetone-*d*<sub>6</sub>): δ 8.40 (s, 2 H, *H*-5 of carbazole), 7.88 (d, *J* = 2.0 Hz, 2 H, *H*-4 of carbazole), 7.81 (d, *J* = 8.3 Hz, 2 H, *H*-7 of carbazole), 7.68-7.74 (m, 4 H, carbazole), 7.55-7.50 (m, 4 H, spirobifluorene), 7.29 (dd, *J* = 8.0, 1.8 Hz, 2 H, *H*-3' of spirobifluorene), 7.19 (dd, *J* = 8.7, 2.1 Hz, 2 H, *H*-3 of spirobifluorene), 7.09-7.02 (m, 6 H, meta-C<sub>6</sub>H<sub>5</sub>, carbazole), 6.90 (d, *J* = 1.6 Hz, 2 H, *H*-1' of spirobifluorene), 6.90-6.81 (m, 6 H, ortho and para of C<sub>6</sub>H<sub>5</sub>), 6.43 (d, *J* = 2.0 Hz, 2 H, *H*-1 of spirobifluorene), 4.39 (q, *J* = 6.4 Hz, 4 H, CH<sub>2</sub>CH<sub>3</sub>), 1.41 (t, *J* = 7.2 Hz, 6 H, CH<sub>2</sub>CH<sub>3</sub>), 1.20 (s, 18 H, CH<sub>3</sub>). Anal. Calcd for C<sub>75</sub>H<sub>62</sub>N<sub>6</sub>: C, 86.01; H, 5.97; N, 8.02. Found: C, 85.55; H, 5.95; N, 7.91.

**16.** Pale yellow solid. Yield: 31%. FAB MS: *m/e* 1163 (M+H)<sup>+</sup>. <sup>1</sup>H NMR (CDCl<sub>3</sub>): δ 7.98 (d, *J* = 8.5 Hz, 4 H, C<sub>6</sub>H<sub>4</sub>), 7.75 (d, *J* = 8.8 Hz, 4 H, C<sub>6</sub>H<sub>4</sub>), 7.73 (d, *J* = 8.1 Hz, 2 H, *H*-4 of spirobifluorene), 7.54 (d, *J* = 8.0 Hz, 2 H, *H*-4' of spirobifluorene), 7.51 (d, *J* = 8.5 Hz, 4 H, C<sub>6</sub>H<sub>4</sub>), 7.30 (dd, *J* = 8.0, 1.9 Hz, 2 H, *H*-3' of spirobifluorene), 7.16 (t, *J* = 7.8 Hz, 4 H, meta-C<sub>6</sub>H<sub>5</sub>), 7.08 (dd, *J* = 8.2, 2.0 Hz, 2 H, *H*-3 of spirobifluorene), 7.01-6.97 (m, 6 H, ortho and para of C<sub>6</sub>H<sub>5</sub>), 6.92 (d, *J* = 8.8 Hz, 4 H, C<sub>6</sub>H<sub>4</sub>), 6.80 (d, *J* = 1.6 Hz, 2 H, *H*-1' of spirobifluorene), 6.57 (d, *J* = 2.0 Hz, 2 H, *H*-1 of spirobifluorene), 1.34 (s, 18 H, CH<sub>3</sub>), 1.12 (s, 18 H, CH<sub>3</sub>). Anal. Calcd for C<sub>81</sub>H<sub>74</sub>N<sub>6</sub>O<sub>2</sub>: C, 83.62; H, 6.41; N, 7.22. Found: C, 84.09; H, 6.06; N, 7.16.
